# Supplementary material for: DeepACSON automated segmentation of white matter in 3D electron microscopy
Source: PubMed Central journal article supplement (PMC7876004; doi:10.1038/s42003-021-01699-w), 2021-02-10
Supplement: 42003_2021_1699_MOESM3_ESM.pdf [file 42003_2021_1699_MOESM3_ESM.pdf]

## Description of Additional Supplementary Files

**File Name:** Supplementary Data 1

**Description:** The source data file of the morphology analysis of myelinated axons (Fig. 5d).

**File Name:** Supplementary Data 2

**Description:** The source data file of the inter-mitochondrial distance analysis in myelinated axons (Fig. 5d).

**File Name:** Supplementary Data 3

**Description:** The source data file of the myelinated axon density (Fig. 5e) and cell nucleus density (Fig. 5f).

**File Name:** Supplementary Data 4

**Description:** The source data file of quantitative evaluations (Fig. 6a-f) and computation times (Fig. 6g).
